# Supplementary material for: Selective hydrogen bonding controls temperature response of layer-by-layer upper critical solution temperature micellar assemblies
Source: Royal Society of Chemistry journal article supplement (doi:10.1039/d0sm01997f), 2021-01-01
Supplement: d0sm01997f1.pdf [file d0sm01997f1.pdf]

## Selective Hydrogen Bonding Controls Temperature Response of Layer-by-Layer Micellar Assemblies

Aliaksei Aliakseyeu,<sup>1</sup> Victoria Albright,<sup>1</sup> Danielle Yarbrough,<sup>1</sup> Samantha Hernandez,<sup>2</sup> Qing  
Zhou,<sup>1</sup> John F. Ankner,<sup>3</sup> and Svetlana A. Sukhishvili<sup>1\*</sup>

<sup>1</sup>Department of Materials Science & Engineering, Texas A&M University, College Station, TX  
77843, USA

<sup>2</sup>College of Veterinary Medicine, Texas A&M University, College Station, TX 77843, USA

<sup>3</sup>Spallation Neutron Source, Oak Ridge National Laboratory, Oak Ridge, TN 37831, USA

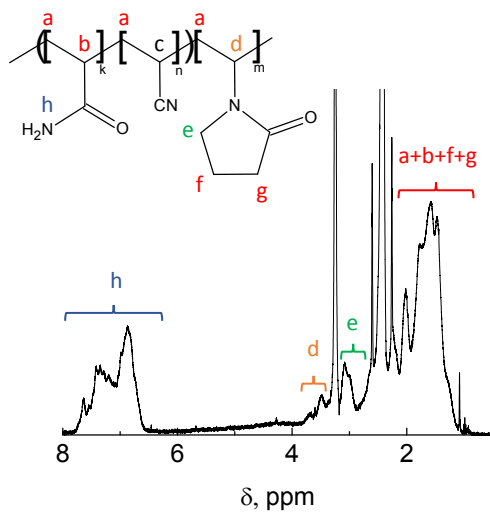

**Figure S1.** <sup>1</sup>H NMR of P(AAm-co-AN)-b-PVP in d<sub>6</sub>-DMSO.

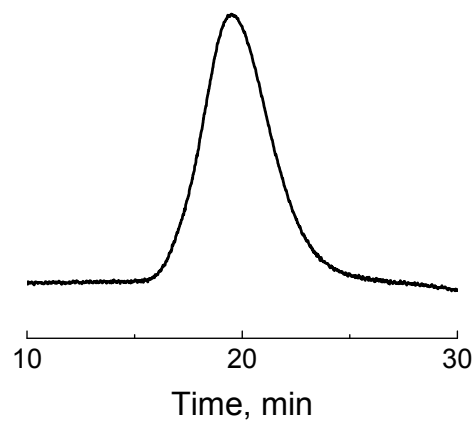

**Figure S2.** A GPC trace of 2 mg/ml P(AAm-co-AN)-b-PVP in DMSO. Flow rate of the eluent was 0.1 ml/min at 45 °C.

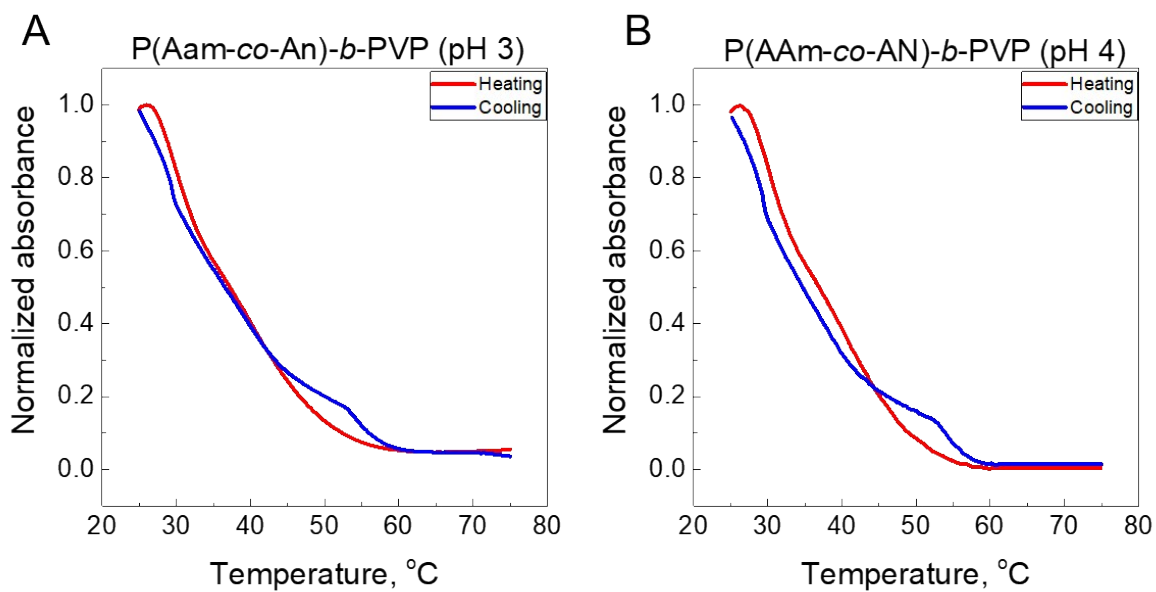

**Figure S3.** Temperature dependent turbidity in 1 mg/ml P(AAm-co-AN)-b-PVP solutions in PBS at pH 3 (A) and pH 4 (B).

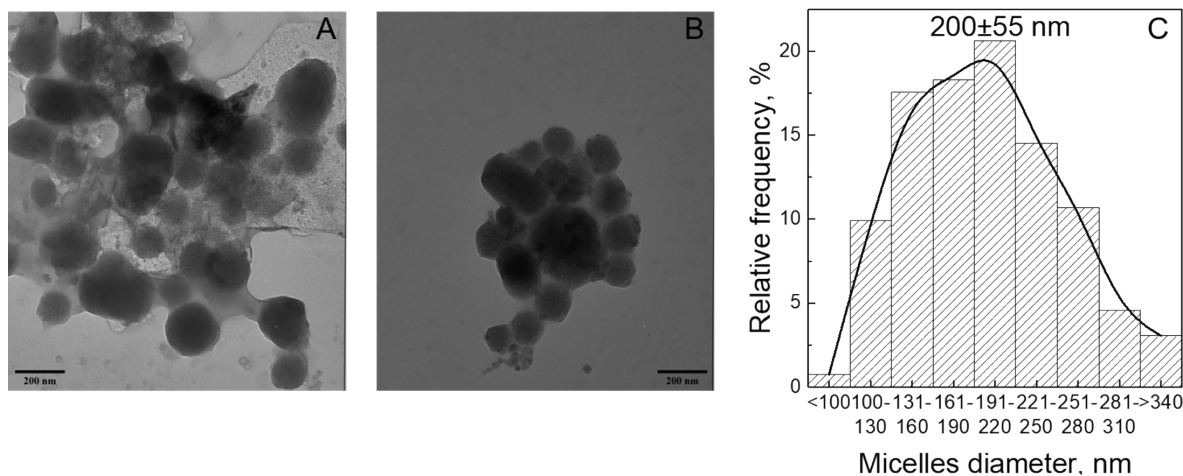

**Figure S4.** TEM images of UCSTMs dried from solutions at pH 3 (A) and pH 4 (B), as well as the micellar size distribution (C) dried from pH 4 solution.

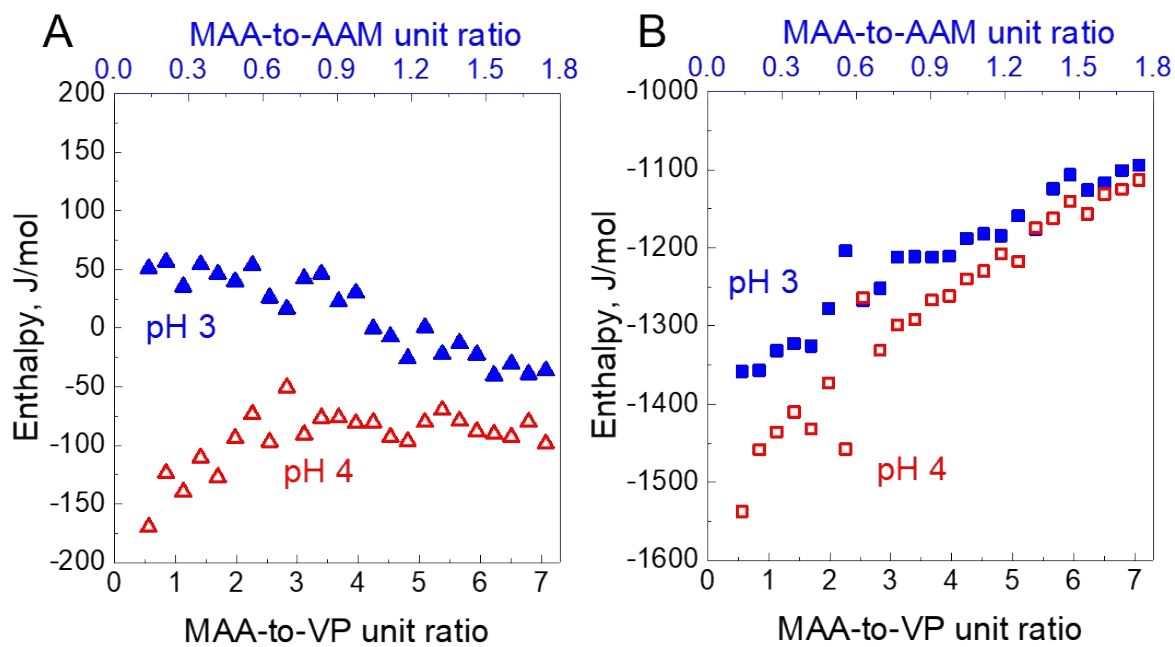

**Figure S5.** Enthalpy of dilution for PMAA to PBS at pH 3 and pH 4 at 25 °C (A) and 55 °C (B).

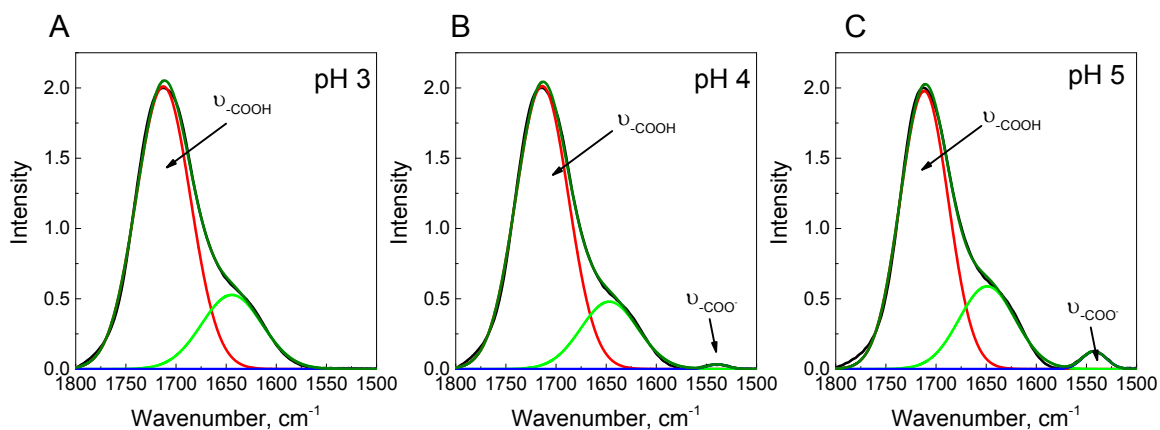

**Figure S6.** FTIR spectra of PMAA freeze-dried at pH 3 (A), pH 4 (B) and pH 5 (C). Assuming that the extinction coefficients of stretching carbonyl vibrations of ionized and nonionized PMAA are equal, ionization of PMAA was determined as  $0.6 \pm 0.1 \%$  at pH 4 and  $3.8 \pm 0.2 \%$  at pH 5 from the ratio of  $1540 \text{ cm}^{-1}$  to the sum of two  $1540$  and  $1720 \text{ cm}^{-1}$  peaks in the  $1500\text{-}1800 \text{ cm}^{-1}$  region.

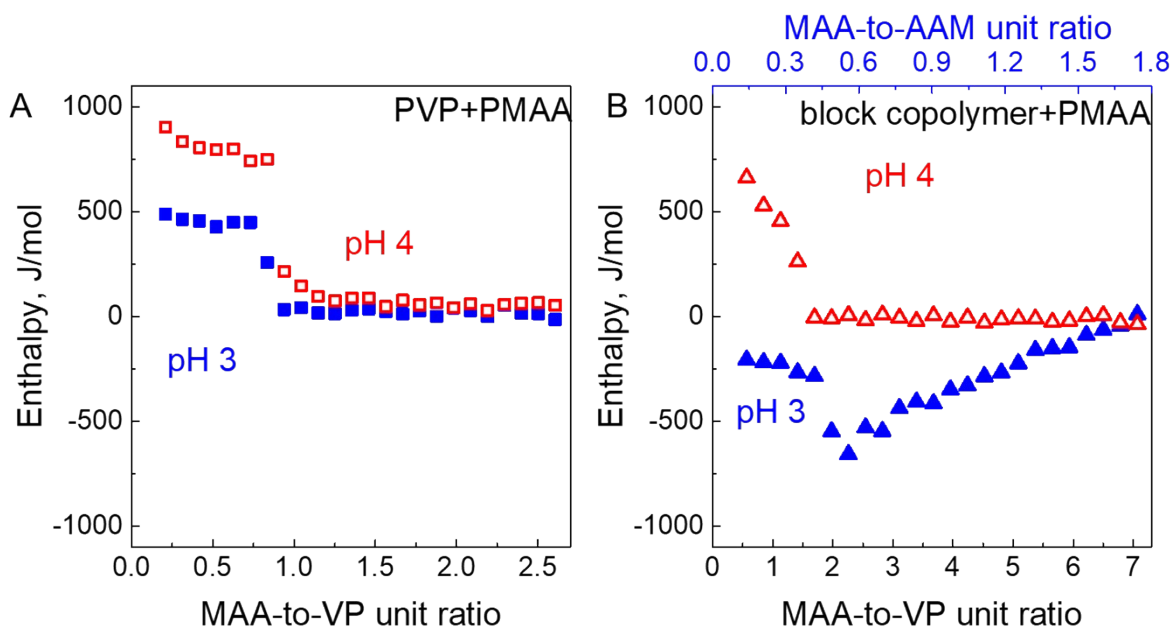

**Figure S7.** ITC titration of PVP (A), and P(AAm-co-AN)-*b*-PVP (B) with PMAA at pH 3 (closed symbols) and pH 4 (open symbols) at  $55 \text{ }^\circ\text{C}$ .

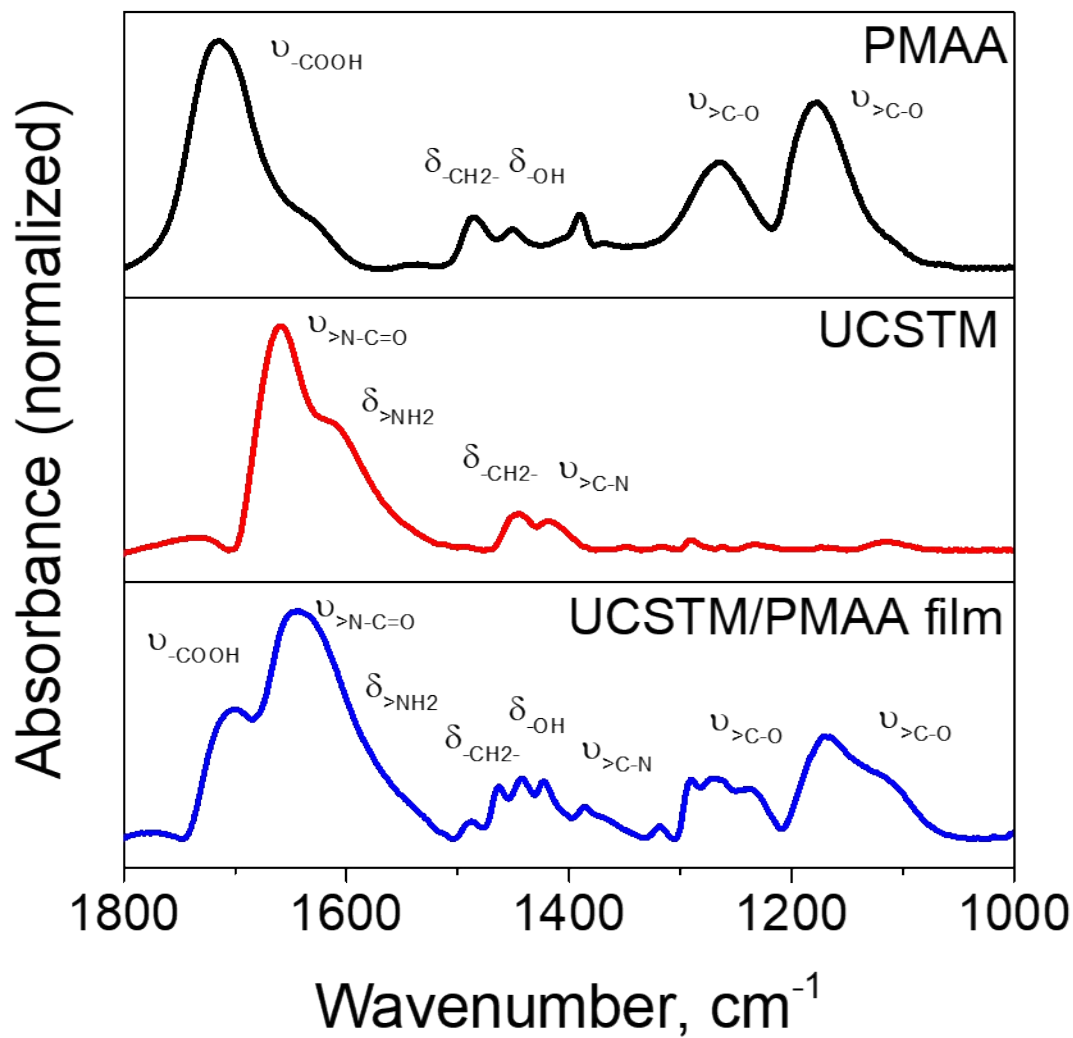

**Figure S8.** FTIR spectra of PMAA and UCSTM drop casted and dried on pre-cleaned silicon wafers, as well as UCSTMs/PMAA films deposited at pH 3.

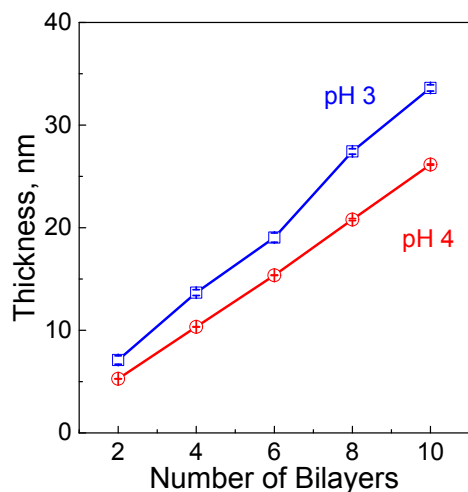

**Figure S9.** Ellipsometric dry thickness of PVP/PMAA films deposited at pH 3 (open squares, blue) and pH 4 (open circles, red) at room temperature.

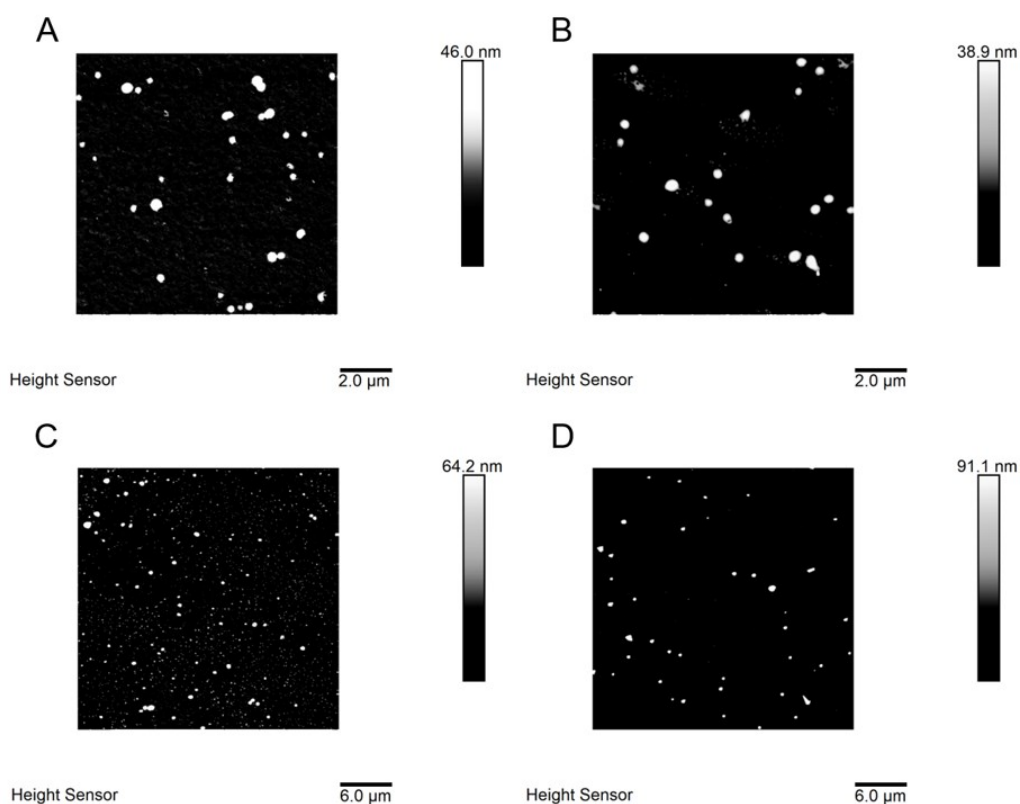

**Figure S10.** AFM images of monolayer of micelles deposited at pH 3 (A) and 4 (B) and 2 bilayer (UCSTM/PMAA) films deposited at pH 3 (C) and 4 (D) on silicon substrate. All substrates were primed with BPEI/PMAA layer prior to the micelles deposition.

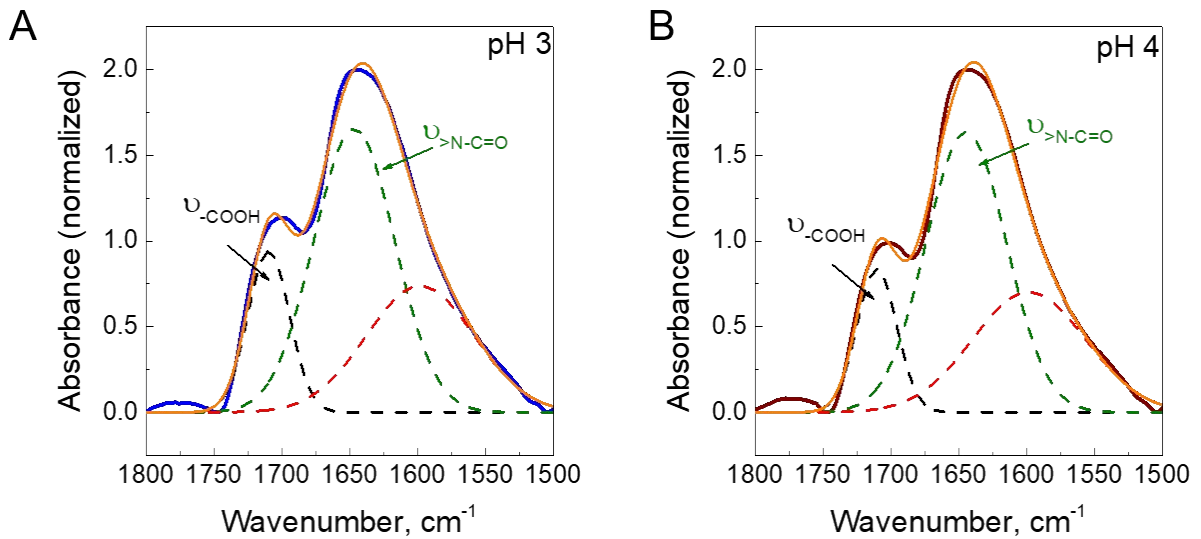

**Figure S11.** Deconvolution of FTIR spectra of UCSTM/PMAA films deposited at pH 3 (A) and pH 4 (B) in the 1500-1800  $\text{cm}^{-1}$  region. The ratio of integrated intensities of stretching vibrations of PMAA ( $\nu_{\text{-COOH}}$ ) to those of stretching vibrations of P(AAm-co-AN) block of UCSTMs ( $\nu_{\text{>N-C=O}}$ ) is  $0.3 \pm 0.01$  and  $0.25 \pm 0.01$  at pH 3 and 4, respectively, suggesting a lower content of PMAA in films deposited at pH 4.

### Fitting Model For Neutron Reflectometry Data:

Below is the model used for fitting the data obtained from neutron reflectometry experiments.

The thicknesses of the three stacks are then:

$$d_H^{pure} = \sum_{l=0}^7 d_l$$

$$d_D^{pure} = \sum_{l=8}^9 d_l$$

$$d_{H1}^{pure} = \sum_{l=10}^{17} d_l$$

where the initial bilayer thickness  $d_l$  (or  $d_0$ ) is a fitted parameter.

If the material deposited in sharply defined bilayers, the summation results in the total thickness of the film. The marker layer,  $d_D$ , yields information on how much the bilayers intermix with preceding and subsequently deposited material, so we can fit  $d_D$  as well and then we can get the thicknesses of the H-blocks, where in addition to  $d_0$  and  $\epsilon$  we now fit  $d_D$ .

$$d_H = \sum_{l=0}^8 d_l - d_D/2,$$

$$d_{H1} = \sum_{l=9}^{17} d_l - d_D/2,$$

To breakdown the SLD data, the varying film density should be taken into account and can be represented as:

$$\Sigma = \rho \frac{N_A \sum_j b_j}{M} \equiv \rho S,$$

where  $\rho$  is the mass density,  $N_A$  Avogadro's number,  $\sum_j b_j$  the sum of the scattering lengths in the formula unit (e.g. monomer), and  $M$  the atomic mass of the formula unit. In this way, we can separate the mass density from the stoichiometry  $S$  for each of the components of the film (PMAA, dPMAA, UCSTMs, and H<sub>2</sub>O) and treat mass density as a fitted parameter.

The non-deuterated strata of the film follow the same hydration and mixing, except with PMAA rather than dPMAA,

$$\Sigma_H = \rho(f_{H_2O}S_{H_2O} + (1 - f_{H_2O})[f_{PMAA}S_{PMAA} + (1 - f_{PMAA})S_{UCSTM}]),$$

where  $f_{H_2O}$  is the water volume fraction,  $f_{PMAA}$  the fraction of PMAA deposited per bilayer. The SLD of marker layer is the following:

$$\Sigma_D^{pure} = \rho(f_{H_2O}S_{H_2O} + (1 - f_{H_2O})[f_{PMAA}S_{dPMAA} + (1 - f_{PMAA})S_{UCSTM}]),$$

The ratio between the fitted thickness of the marker layer and thickness of an unmixed marker bilayer  $d_D^{pure}$  can be used to constrain the SLD of the marker layer. The actual marker layer does not go down as a perfectly sharp, pure layer, but is instead distributed over a greater thickness so that the marker layer has mixed into the material from the adjacent layers,

$$f_d = d_D^{pure}/d_D$$

$$\Sigma_D = f_d \Sigma_D^{pure}$$

Parameters obtained from and used in the fit are presented in Table S1 and S2



**Table S1.** Model parameters for a (UCSTM/PMAA)<sub>8</sub>/(UCSTM/dPMAA)<sub>2</sub>/(UCSTM/PMAA)<sub>8</sub> film deposited from buffer solution at pH 3.0.

| Layer                      | $Nb$ , (Å <sup>-2</sup> ) | $d$ , (Å) | $\sigma_{int}$ , (Å) | $d_0$ , (Å) | $f_{PMAA}$ | $f_{H_2O}$ | $\rho$ , g/cm <sup>3</sup> | $f_d$ |
|----------------------------|---------------------------|-----------|----------------------|-------------|------------|------------|----------------------------|-------|
| (UCSTM/PMAA) <sub>8</sub>  | 1.07e-6                   | 285.7     | 230.8                | 44.7        | 0.82       | 0.10       | 1.11                       | 0.62  |
| (UCSTM/dPMAA) <sub>2</sub> | 2.52e-6                   | 144.1     | 126.3                |             |            |            |                            |       |
| (UCSTM/PMAA) <sub>8</sub>  | 1.07e-6                   | 285.7     | 77.6                 |             |            |            |                            |       |
| BPEI                       | 5.0e-7                    | 27.3      | 27.3                 | N/A         | N/A        | N/A        | N/A                        | N/A   |
| SiO2                       | 3.23e-6                   | 21.6      | 6.0                  |             |            |            |                            |       |
| Si                         | 2.05e-6                   | 100.0     | 10.0                 |             |            |            |                            |       |

**Table S2.** Model parameters for a (UCSTM/PMAA)<sub>8</sub>/(UCSTM/dPMAA)<sub>2</sub>/(UCSTM/PMAA)<sub>8</sub> film deposited from buffer solution at pH 4.0.

| Layer                      | $Nb$ , (Å <sup>-2</sup> ) | $d$ , (Å) | $\sigma_{int}$ , (Å) | $d_0$ , (Å) | $f_{PMAA}$ | $f_{H_2O}$ | $\rho$ , g/cm <sup>3</sup> | $f_d$ |
|----------------------------|---------------------------|-----------|----------------------|-------------|------------|------------|----------------------------|-------|
| (UCSTM/PMAA) <sub>8</sub>  | 1.11e-6                   | 207.0     | 173.5                | 24.2        | 0.65       | 0.09       | 1.10                       | 0.69  |
| (UCSTM/dPMAA) <sub>2</sub> | 2.37e-6                   | 70.7      | 62.9                 |             |            |            |                            |       |
| (UCSTM/PMAA) <sub>8</sub>  | 1.11e-6                   | 207.0     | 44.5                 |             |            |            |                            |       |
| BPEI                       | 4.95e-7                   | 15.1      | 15.1                 | N/A         | N/A        | N/A        | N/A                        | N/A   |
| SiO2                       | 3.2e-6                    | 24.3      | 10.0                 |             |            |            |                            |       |
| Si                         | 2.02e-6                   | 100.0     | 5.0                  |             |            |            |                            |       |
